# Supplementary material for: One-step synthesis of three-dimensional porous ionic liquid–carbon nanotube–graphene gel and MnO2–graphene gel as freestanding electrodes for asymmetric supercapacitors
Source: Royal Society of Chemistry journal article supplement (doi:10.1039/c4ra16071a), 2015-01-01
Supplement: c4ra16071a1.pdf [file c4ra16071a1.pdf]

## Supplementary Information

# One-step synthesis of three-dimensional porous ionic liquid-carbon nanotube-graphene gel and MnO<sub>2</sub>-graphene gel as freestanding electrodes for asymmetric supercapacitor

Yimin Sun,<sup>\*a</sup> Yubo Cheng,<sup>a</sup> Kui He,<sup>a</sup> Aijun Zhou,<sup>a</sup> and Hongwei Duan<sup>\*b</sup>

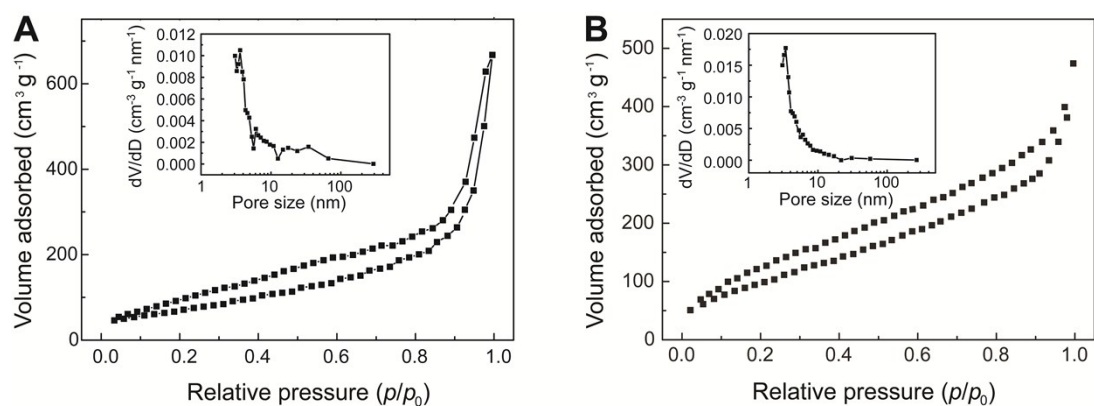

**Fig. S1** Nitrogen gas adsorption and desorption isotherms of (A) IL-CNT-rGO gel and (B) MnO<sub>2</sub>-rGO gel. Insets are the corresponding pores size distribution (PSD) for IL-CNT-rGO gel and MnO<sub>2</sub>-rGO gel.

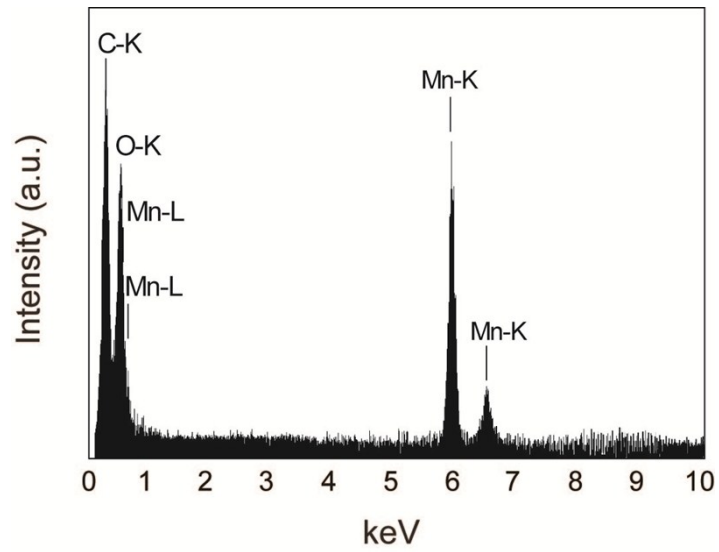

**Fig. S2** EDS spectrum of  $\text{MnO}_2$ -rGO gel.

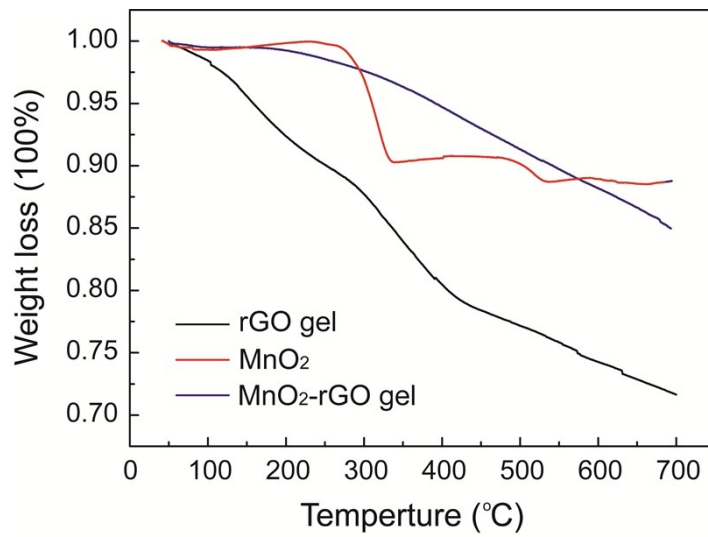

**Fig. S3** TGA analysis of rGO gel,  $\text{MnO}_2$  and  $\text{MnO}_2$ -rGO gel.
